# Supplementary material
Source: HighWire-hosted journal article supplement (https://jnm.snmjournals.org/highwire/filestream/95274/field_highwire_adjunct_files/0/197608_Supplemental_Data.pdf)
Supplement: 197608_Supplemental_Data.pdf [file 197608_Supplemental_Data.pdf]

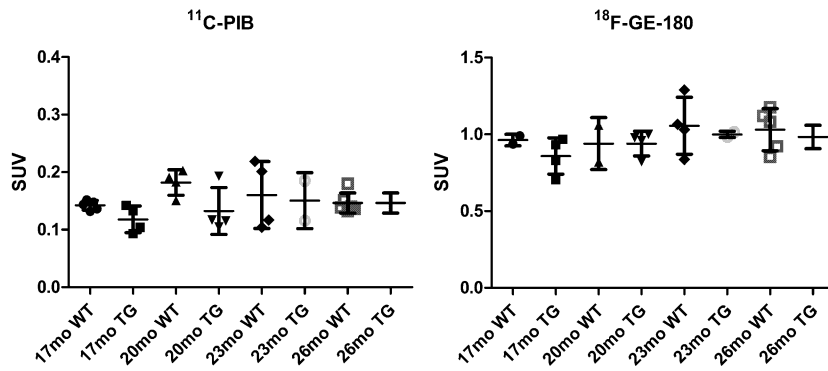

**Supplemental figure 1.** <sup>11</sup>C-PIB and <sup>18</sup>F-GE-180 uptake in the cerebellum (CB) of tg and wt APP23 mice from 17 to 26 months expressed as standardized uptake values (SUV).

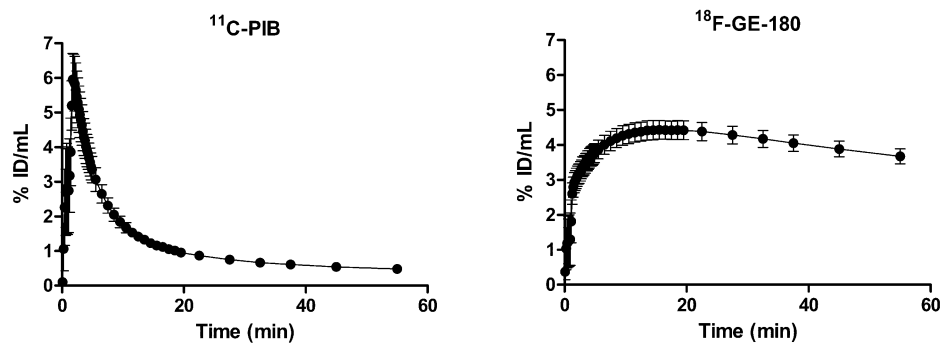

**Supplemental figure 2.** Representative <sup>11</sup>C-PIB and <sup>18</sup>F-GE-180 time activity curves (TACs) as %ID/mL(Average ± SD of 6 wt mice)

**Supplemental table 1.** Percentage of <sup>11</sup>C-PIB and <sup>18</sup>F-GE-180 increase uptake of TG vs WT 26 mo mice in the *in vivo* and *ex vivo* studies. FC = frontal cortex, PTC = Parietotemporal cortex, Hippo = Hippocampus, THA = Thalamus, CB = Cerebellum.

|                 | <sup>11</sup> C-PIB |                | <sup>18</sup> F-GE-180 |                |
|-----------------|---------------------|----------------|------------------------|----------------|
|                 | <i>In vivo</i>      | <i>Ex vivo</i> | <i>In vivo</i>         | <i>Ex vivo</i> |
|                 | (%)                 | (%)            | (%)                    | (%)            |
| <b>FC/CB</b>    | 186                 | 172            | 25                     | 42             |
| <b>PTC/CB</b>   | 137                 | 133            | 30                     | 38             |
| <b>HIPPO/CB</b> | 124                 | 76             | 21                     | 39             |
| <b>THA/CB</b>   | 57                  | 69             | 6                      | 19             |
